# 1 Spindle position dictates division site during asymmetric cell division 2 in moss

3  
4 Elena Kozgunova<sup>1\*</sup>, Mari W. Yoshida<sup>1</sup> and Gohta Goshima<sup>1,2\*</sup>

5  
6 <sup>1</sup>Division of Biological Science, Graduate School of Science, Nagoya University, Furo-  
7 cho, Chikusa-ku, Nagoya, Aichi 464-8602, Japan

8 <sup>2</sup>Sugashima Marine Biological Laboratory, Graduate School of Science, Nagoya  
9 University, Sugashima, 429-63, Toba 517-0004, Japan

10 \*Correspondence should be addressed to [kozgunova@gmail.com](mailto:kozgunova@gmail.com);

11 [goshima@bio.nagoya-u.ac.jp](mailto:goshima@bio.nagoya-u.ac.jp)

12 Phone & Fax: +81 52-788-6174

## 13 14 Abstract

15 Asymmetric cell division (ACD) underlies the development of multicellular organisms.  
16 The division site in plant cells is predetermined prior to mitosis and the localization of  
17 the mitotic spindle is considered static, unlike in animal ACD, where the cell division site  
18 is defined by active spindle-positioning mechanisms. Here, we isolated a novel mutant of  
19 the microtubule-associated protein TPX2 in the moss *Physcomitrella patens* and observed  
20 abnormal spindle motility, which led to inverted asymmetric division during organ  
21 development. This phenotype was rescued by restoring endogenous TPX2 function and,  
22 unexpectedly, by depolymerizing actin filaments. Thus, we identify an active spindle-  
23 positioning mechanism involving microtubules and actin filaments that sets the division  
24 site in plants, which is reminiscent of the acentrosomal ACD in animals, and suggests the  
25 existence of a common ancestral mechanism.

## 26 27 Introduction

28 Chromosome segregation during mitosis and meiosis is driven by the complex  
29 microtubule (MT)-based apparatus known as the spindle. Animal spindles are known to  
30 be mobile and their final position corresponds to the future cytokinesis site, which in turn,  
31 could determine daughter cell fate after asymmetric division. The mechanism whereby  
32 the spindle is positioned and spatially controls the assembly of the cytokinetic machinery  
33 is well studied in animals and the critical roles of force-generating machineries, such as  
34 dynamic MTs, actin, and motor proteins, have been elucidated (Bergstralh et al., 2017;  
35 Kiyomitsu, 2019). However, in plants, it was long believed that the pre-prophase band  
36 (PPB), a plant-specific MT-actin belt formed prior to mitotic entry, determines the future  
37 cell division site (Buschmann and Müller, 2019; Rasmussen and Bellingier, 2018; Verma,  
38 2001). The mitotic spindle always forms perpendicular to and at the site of the PPB,  
39 perhaps by the action of bridging MTs that connect the spindle to the former PPB site  
40 (Ambrose and Cyr, 2008). The spindle position is considered to be static, unless a strong

41 force ( $1600-3350 \times g$ ) is applied through centrifugation, which also causes other  
42 cytoplasmic components to translocate (Arima et al., 2018; Ôta, 1961). The static nature  
43 of spindles is consistent with the fact that plants lack centrosomes, which play key roles  
44 in spindle translocation in animal somatic cells (Bergstrahl et al., 2017; Kiyomitsu, 2019).  
45 Multiple proteins co-localized to the PPB are required to establish and maintain the  
46 cortical division zone (CDZ), towards which the cytoskeleton-based cytokinetic  
47 machinery, known as the phragmoplast, expands while recruiting cell plate components  
48 (Müller, 2019; Smertenko et al., 2017).

49 However, the essential role of the PPB in determining the cell division site has  
50 recently been challenged. *Arabidopsis thaliana* mutants lacking the PPB do not show  
51 severe defects in oriented cell division, as anticipated from the prevailing model described  
52 above (Schaefer et al., 2017). Although spindle orientation is more variable in the PPB-  
53 null mutants, the mean value is similar to the mean value of wild-type plants.  
54 Consequently, global tissue organization and plant morphogenesis are normal in the  
55 absence of the PPB.

56 The moss *Physcomitrella patens* is an attractive model plant in studying PPB-  
57 independent division plane determination, as most cell types naturally lack PPBs, but are  
58 capable of oriented cell division and patterning into complex 3D structures, such as  
59 gametophores (leafy shoots) (Kosetsu et al., 2017; Moody et al., 2018). We have  
60 previously shown that the MT structure, called the gametosome, appears in the cytoplasm  
61 transiently at prophase and acts as the determinant of spindle orientation (Kosetsu et al.,  
62 2017). However, gametosomes are dispensable for spindle MT generation or spindle  
63 positioning.

64 In animal cells, the mitotic spindle is assembled through rapid MT nucleation and  
65 amplification aided by multiple proteins, including  $\gamma$ -tubulin, augmin and TPX2  
66 (targeting factor for Xklp2) (Petry, 2016). Previous study in *A. thaliana*, using a  
67 combination of knockout and cross-species antibody injection, suggested TPX2 to be an  
68 essential gene (Vos et al., 2008). However, these results were recently questioned when  
69 several viable AtTPX2 t-DNA insertion mutants were obtained (Boruc et al., 2019).  
70 Beside canonical TPX2, several TPX2-like genes, lacking one or more functional  
71 domains, were identified in *A. thaliana*. Among them, TPX2L3 lacks C-terminal kinesin-  
72 binding motif but is strongly associated with Aurora kinases and essential for  
73 embryogenesis (Boruc et al., 2019). However, how TPX2 contributes to spindle  
74 formation and MT amplification in plant cells remains unknown. In this study, we aimed  
75 to characterize TPX2 function in the spindle assembly in *P. patens*, wherein many  
76 research tools, including inducible RNAi, endogenous gene tagging and highly efficient  
77 CRISPR are easily applicable (Leong et al., 2018; Yamada et al., 2016; Yi and Goshima,  
78 2019). In addition to TPX2's role in the MT amplification during early mitosis, we found  
79 an unexpected function of TPX2 in maintaining spindle position during asymmetric cell  
80 division in gametophores.

81

## 82 Results & Discussion

83 We identified five genes homologous to *TPX2* in the *P. patens* genome using a  
84 BLAST search and named them *TPX2-1* to *-5* (Figure 1A). *TPX2-1* to *-4* proteins show  
85 high similarity to canonical *TPX2* in seed plants (e.g., *A. thaliana*, *Oryza sativa*), whereas  
86 *TPX2-5* appears to have lost the N-terminal Aurora-binding motif (Boruc et al., 2019;  
87 Tomašítková et al., 2015; Vos et al., 2008), but retains the highly conserved C-terminal  
88 domains and to certain extent,  $\gamma$ -tubulin activation motifs (Alfaro-Aco et al., 2017)  
89 (Figure 1A, B). During mitosis, endogenous *TPX2-1*, *-2*, and *-4* proteins fused with  
90 fluorescently tagged Citrine (“Cit”) or mNeonGreen (“NG”) in-frame at the C- or N-  
91 terminal, were enriched at the polar region of the spindle and phragmoplast, suggesting  
92 that they preferentially bind to MT minus ends (Figure 1C, Supplemental Figure 1,  
93 Supplemental Video 1). A similar localization has been reported for *Arabidopsis* *TPX2*  
94 (Boruc et al., 2019; Vos et al., 2008). *TPX2-5* was observed as dim speckles in the spindle  
95 and showed more uniform binding to phragmoplast MTs (Figure 1C, Supplemental  
96 Figure 1E, Supplemental Video 1). Unlike *TPX2* of animals or seed plants (Boruc et al.,  
97 2019; Vos et al., 2008), none of the *TPX2* proteins of *P. patens* were sequestered in the  
98 nucleus during interphase (Supplemental Figure 2A, B).

99 The similarity in amino acid sequences and intracellular localization suggested that  
100 *TPX2-1* to *-4* have redundant functions. We, therefore, simultaneously targeted these  
101 genes using a previously established CRISPR/Cas9 protocol (Leong et al., 2018). We  
102 isolated a line, named *TPX2 1-4Δ*, in which frameshifts were introduced to all four *TPX2*  
103 genes in the exons present in all transcript variants identified in the Phytozome database  
104 (Supplemental Figure 3A). The *TPX2 1-4Δ* line developed protonema (tissue comprised  
105 of frequently dividing tip-growing cells) and gametophores in a similar manner to the  
106 parental “GH” line (control, Supplemental Figure 3B). We then attempted to knock out  
107 the *TPX2-5* gene in the *TPX2 1-4Δ* background, by means of homologous recombination.  
108 However, we could not isolate a knockout line after multiple attempts. Given the high  
109 efficiency of homologous recombination in *P. patens*, the *TPX2-5* gene is likely essential  
110 in the *TPX2 1-4Δ* background.

111 Nonetheless, in our attempt to knockout the *TPX2-5* gene, we isolated a line with  
112 dwarf gametophores and defective leaf development (Figure 2A, Supplemental Figures  
113 3B, 4E). In this line, the original *TPX2-5* gene was replaced with a hygromycin cassette,  
114 as confirmed by PCR and sequencing (Supplemental Figure 3C, D). However, DNA was  
115 amplified by PCR using *TPX2-5*’s “internal” primers, and we confirmed that all exons  
116 from *TPX2-5* gene remained in the genome by sequencing. These data suggested that the  
117 *TPX2-5* gene removed from the original locus was re-inserted in the genome, possibly  
118 through micro-homology recombination, resulting in compromised expression of the  
119 *TPX2-5* protein. Hereafter, this hypomorphic line is referred to as “*TPX2-5 HM*”.

120 To test if the line indeed represents a hypomorphic mutant of *TPX2*, we performed a  
121 rescue experiment in which a frameshift repair construct targeting *TPX2-4* was  
122 transformed into the *TPX2-5 HM* line (Supplemental Figure 4A). The selected lines in

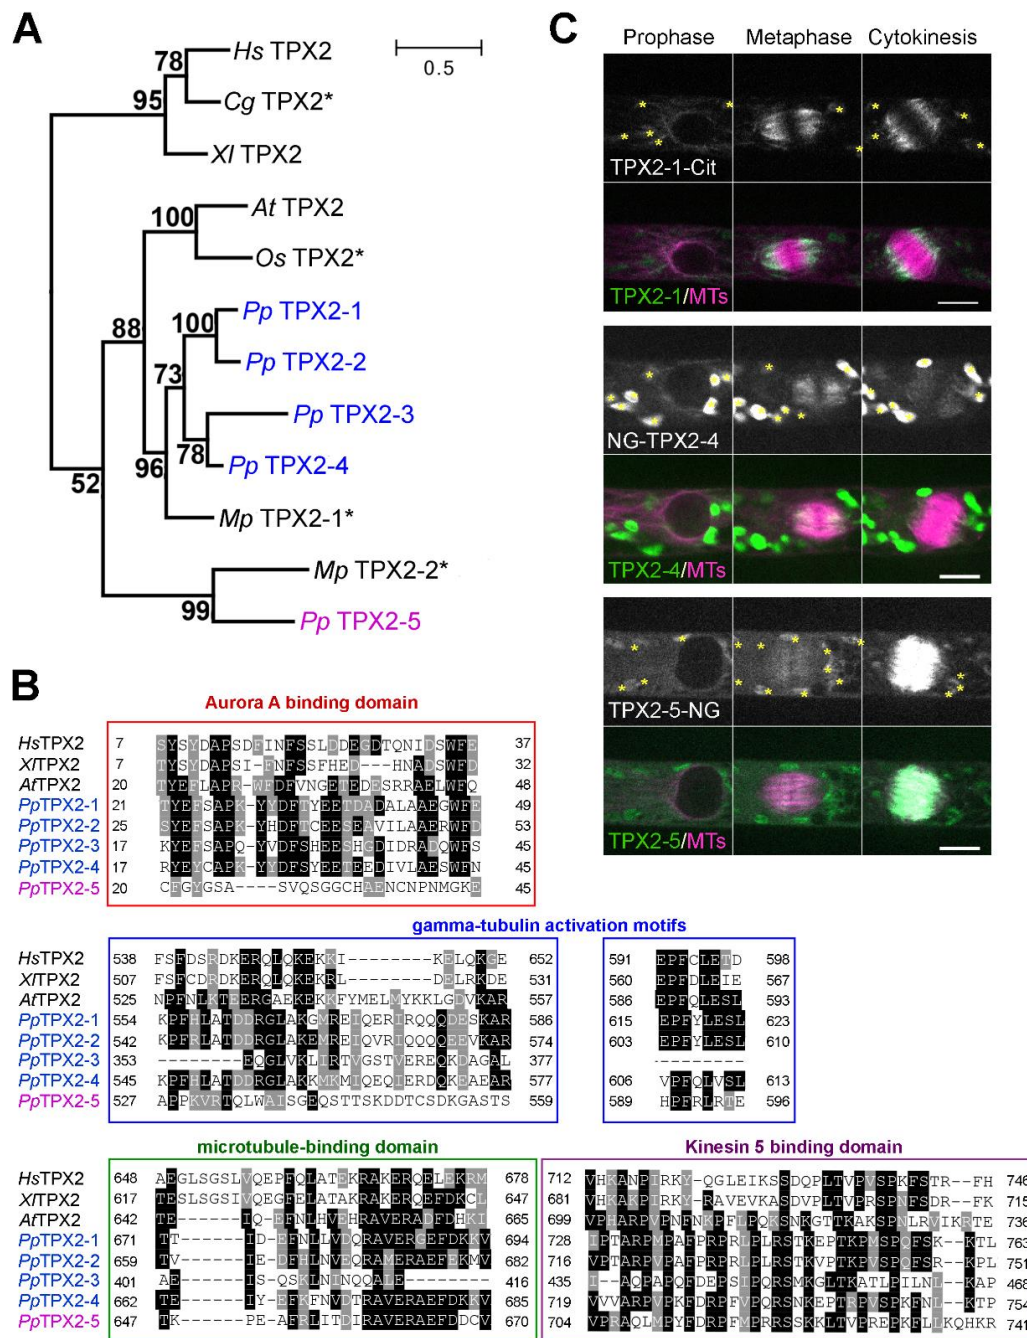

123  
124 **Figure 1. TPX2 homologues and their localization in *P. patens***

125 (A) Phylogeny analysis revealed two distinct groups of TPX2 proteins in *P. patens*: Pp TPX2-1 to -4  
126 (blue), which are more similar to TPX2 genes from seed plants, and atypical TPX2-5 (magenta). Asterisks  
127 mark predicted proteins, numbers show bootstrap values. Bar, 0.5 amino acid substitutions per site. Note  
128 that AtTPX2L3 and AtTPX2L2 could not be added to this tree, since they lack the C-terminal region that  
129 is conserved in canonical TPX2 proteins. Hs: *Homo sapiens*, Gg: *Gallus gallus*, Xl: *Xenopus laevis*, At:  
130 *Arabidopsis thaliana*, Os: *Oryza sativa*, Pp: *Physcomitrella patens*, Mp: *Marchantia polymorpha*. (B)  
131 Alignment of TPX2 proteins. Conserved residues are boxed, whereas similar amino acids are hatched. (C)  
132 Localization of endogenous TPX2-1-Citrine, mNeonGreen-TPX2-4 and TPX2-5-mNeonGreen. More  
133 uniform spindle localization was detected for TPX2-5. Asterisks indicate autofluorescent chloroplasts. Bar,  
134 10  $\mu$ m. The full version of mitotic localization data is presented in Supplemental Figure 1.



135 which construct integration was confirmed by PCR no longer showed a mitotic delay  
 136 or dwarf gametophore phenotype (Supplemental Figure 4B-E). These results strongly  
 137 suggested that the observed abnormal phenotypes were indeed due to TPX2 malfunction.

138 We next aimed to determine if TPX2 plays a role in the mitosis of gametophore cells,  
 139 as dwarf gametophores are the most prominent phenotype of the *TPX2-5 HM* line (Figure  
 140 2A). Dwarf organ development in plants is often associated with defective cytokinesis  
 141 (Martinez et al., 2017). Thus, we first used the lipophilic dye, FM4-64, to visualize cell  
 142 plates in gametophore initials (stem cells) after the first cell division. We observed that  
 143 the orientation and position of the cell plate shifted to the basal side of the gametophore  
 144 initial in 11 out of 19 cells in the *TPX2-5 HM* mutant, dramatically skewing the ratio  
 145 between apical and basal daughter cells. Importantly, this was due to defective TPX2, as  
 146 the cell plate positioning was normal in the aforementioned repair lines (Figure 2B, C).  
 147

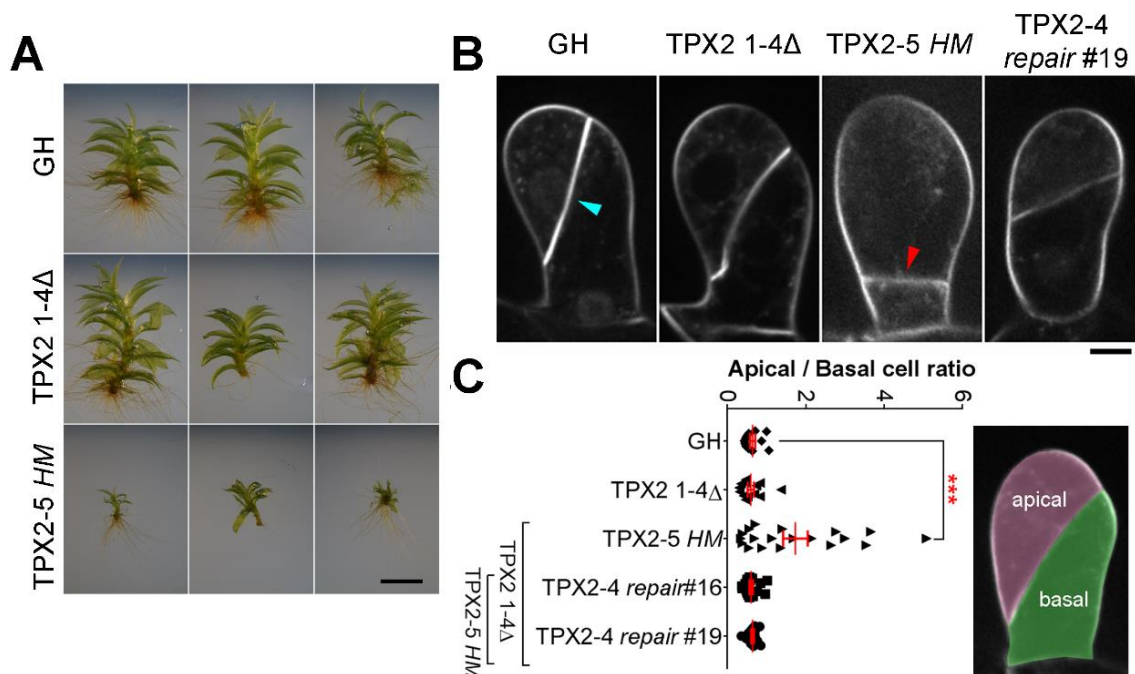

148

149

150 **Figure 2. Abnormal cell division site in the gametophore initial of a TPX2 mutant**

151 (A) Representative photos of gametophores after 4 weeks of culture of GH (control), *TPX2 1-4Δ*, and *TPX2-5 HM*  
 152 lines. Bar, 2 mm. (B) Gametophore initial at the 2-cell stage stained with FM4-64 dye. Normal and  
 153 defective cell plate positions are indicated with cyan and red arrowheads, respectively. Bar, 10 μm (C) The  
 154 apical/basal cell ratio was estimated as the apical cell area (pink) divided by the basal cell area (green),  
 155 measured during the 2-cell stage (n = 12, 13, 19, 18, and 14 for GH, *TPX2 1-4Δ*, *TPX2-5 HM*, *TPX2-4*  
 156 *repair #16*, and *TPX2-4 repair #19* lines, respectively, \*\*\*p = 0.0004 one-way Anova with Dunnetts  
 157 multiple comparison test). Error bars indicate SEM.

158

159

160

161 To observe mitotic MTs in gametophore initial cells, we introduced another marker,  
162 mCherry-tubulin, to *TPX2-5 HM*, *TPX2 I-4Δ*, and control GH lines (note that histone and  
163 tubulin were labelled with the same color). The majority of gametophore initial cells in  
164 the *TPX2-5 HM* line formed a bipolar spindle (90%;  $n = 19$ ; Figure 3A, B), although  
165 slightly smaller than the spindle in the control or *TPX2 I-4Δ* lines (Figure 3C). Strikingly,  
166 we observed that the bipolar metaphase spindle moved unidirectionally over 5  $\mu\text{m}$  to the  
167 basal side in 73% of *TPX2-5 HM* cells (Figure 3A, D, Supplemental Video 2).  
168 Consequently, the phragmoplast formed close to the basal edge. We concluded that  
169 defective spindle positioning after NEBD was the major cause for the abnormal cell plate  
170 position in the gametophore initials of the *TPX2-5 HM* line.

171 In animals, spindle motility relies on MTs and/or actin. To test the involvement of  
172 the cytoskeleton in spindle motility, we first partially depolymerized MTs in the *TPX2-5*  
173 *HM* line using low-dosage oryzalin (200 nM), a MT-destabilizing drug. Upon treatment,  
174 the spindle behaviors were more variable and showed overall differences from untreated  
175 cells. Most notably, in 5 of 16 cells, we observed that the spindle had shifted towards the  
176 apical side of the cells, which was never observed in untreated cells (Figure 3D).  
177 Additionally, the average basal spindle motility decreased. In the presence of oryzalin, 6  
178 out of 16 spindles moved slower than 1  $\mu\text{m}/\text{min}$ , whereas only 1 out of 15 did so in  
179 untreated cells. These data suggested that MTs contribute to spindle motility to a certain  
180 extent.

181 We next investigated the effect of F-actin disruption on spindle motility by adding  
182 latrunculin A, an actin inhibitor. Previously, it was shown that actin inhibition does not  
183 affect spindle morphology, orientation, or positioning in the control line (Kosetsu et al.,  
184 2017). However, latrunculin A treatment completely (20 out of 20 cells) suppressed the  
185 basal motility of the spindle in the *TPX2-5 HM* mutant line (Figure 3D, Supplemental  
186 Video 2). These results suggested an interplay between MTs and actin filaments in spindle  
187 positioning.

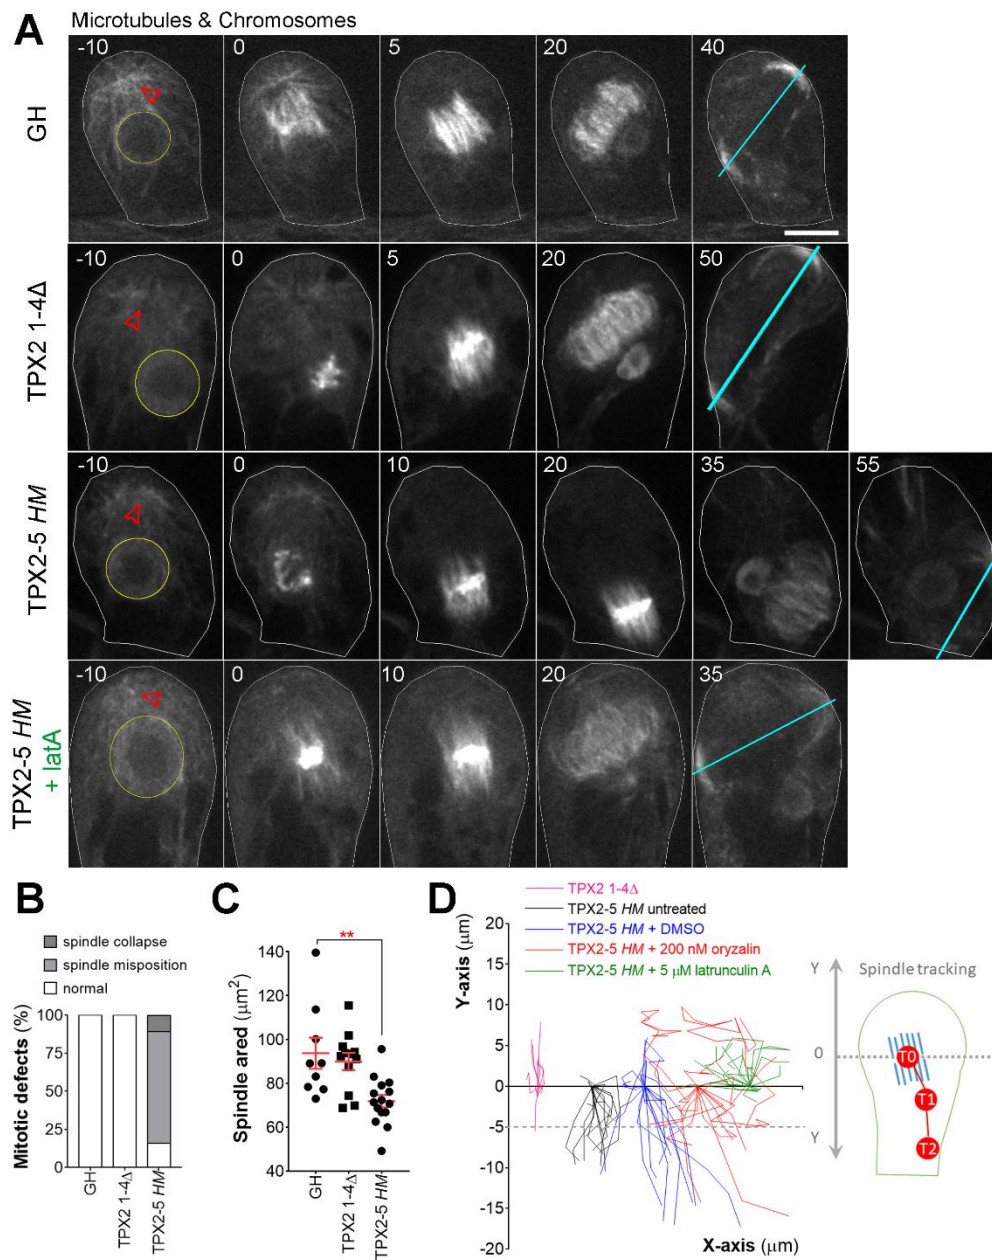

188

189 **Figure 3. Spindle position was actively maintained through the interplay between microtubules and**  
 190 **F-actin**

191 (A) Live-cell imaging of the first asymmetric division in the gametophore initial revealed a link between  
 192 the metaphase spindle and phragmoplast positioning. The positions of the nucleus and gametosome  
 193 (prophase MTOC appeared in the apical cytoplasm) are indicated with yellow circles and red arrowheads,  
 194 respectively. Cyan lines show the position and orientation of the phragmoplast. Cell borders are outlined  
 195 with white lines. Bar, 10 μm. (B) The frequency and type of spindle defects in gametophore initial mitosis  
 196 observed in GH (control), *TPX2 1-4Δ*, and *TPX2-5 HM* lines. (C) Area occupied by the metaphase spindle  
 197 (spindle size) in gametophore initials. (mean ± SEM; \*\**p* = 0.0029, two-tailed Student's *t*-test) (D) Tracking  
 198 of the spindle center position from NEBD to anaphase onset. We assigned the starting position as *Y* = 0  
 199 and different *X* positions for each sample group. Note that after 5 μM latrunculin A treatment, spindles  
 200 never showed motility towards the basal end of the cell, i.e. negative *Y*-values. Each line represents spindle  
 201 movement in a single cell. More than 12 cells were observed for each sample group in three or more  
 202 independent experiments.

203 To gain insights into the molecular function of moss TPX2 towards MTs, we aimed  
204 to perform a detailed analysis of cell division phenotypes in the mutant with the greatest  
205 effect. To this end, we selected an inducible *TPX2-5* RNAi line in the *TPX2 1-4A*  
206 background. Since RNAi induction almost completely inhibited cell growth and  
207 gametophore development, we focused on the division of the protonemal apical stem cells  
208 that appear earlier than gametophores. Using time-lapse imaging of MTs and  
209 chromosomes, we observed severe MT phenotypes during the early stages of mitosis  
210 (Figure 4, Supplemental Video 3). During prophase, we detected a reduction in the  
211 number of perinuclear MTs (Figure 4E), which is also seen with a  $\gamma$ -tubulin RNAi  
212 (Nakaoka et al., 2012), and abnormal nuclear shape, which is unique to this mutant  
213 (elongated nucleus prior to NEBD, Figure 4C). After NEBD, 3 out of 52 cells in the RNAi  
214 lines failed to form bipolar spindles, followed by metaphase arrest and chromosome  
215 missegregation, which was never observed in control lines (Figure 4D). It is noteworthy  
216 that a similar phenotype was observed in 10% of the gametophore initial cells in the  
217 *TPX2-5 HM* line (Figure 3B, Supplemental Video 4). Other cells formed bipolar spindles;  
218 however, the number of MTs in the prometaphase spindle was greatly reduced (Figure  
219 4F, blue). However, this was no longer the case at metaphase, where the number of MTs  
220 was similar to control spindles, indicating the recovery of MT numbers during  
221 prometaphase (Figure 4F, green). Phragmoplast formation and expansion were also  
222 similar to control cells. This is opposite to the findings in augmin-knockdown cells, in  
223 which the number of metaphase spindle MTs and phragmoplast MTs, but not prophase  
224 MTs, is reduced (Nakaoka et al., 2012). A plausible interpretation is that MTs were  
225 generated and reached control levels through  $\gamma$ -tubulin and augmin-dependent MT  
226 amplification during the prolonged prometaphase in the *TPX2* mutant (Petry et al., 2013).  
227 Thus, our results suggested that the role of TPX2 in MT amplification is dominant in early  
228 mitosis. As  $\gamma$ -tubulin activation motifs (Alfaro-Aco et al., 2017) are partially conserved  
229 in all moss TPX2 proteins (Figure 1B), we speculated that TPX2 is required for  $\gamma$ -tubulin-  
230 dependent MT nucleation in prophase and prometaphase, while augmin takes over from  
231 prometaphase. Other phenotypes observed upon TPX2 depletion included chromosome  
232 missegregation (29%) and spindle misposition/orientation (33%, Figure 4D,  
233 Supplemental Video 3). Overall, these phenotypes suggested the functional conservation  
234 of moss TPX2 with well-studied animal orthologues, namely assisting in MT formation  
235 through nucleation and/or stabilization.



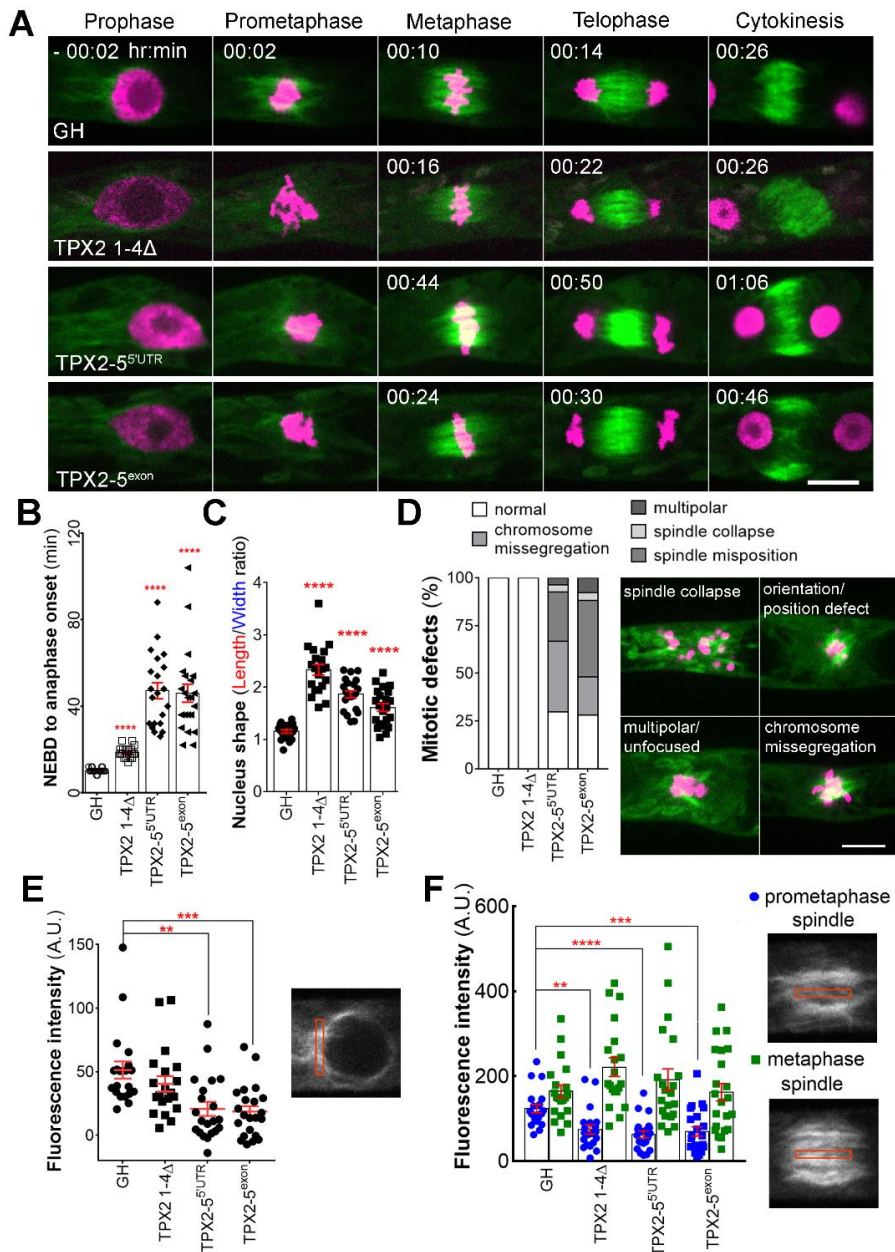

236  
237

**Figure 4. TPX2 contributed to microtubule amplification in early mitosis**

238 (A) Representative images of the mitosis of protonemal apical cells in GH (control), *TPX2 1-4Δ*, *TPX2-*  
 239 *5<sup>UTR</sup>* RNAi, and *TPX2-5<sup>exon</sup>* RNAi lines. Green, GFP-tubulin; Magenta, histoneH2B-mRFP. Bar, 10 μm.  
 240 (B) Mitotic duration calculated from NEBD to anaphase onset (mean ± SEM; \*\*\*\**p* < 0.0001, two-tailed  
 241 Student's t-test). (C) Nucleus shape prior to NEBD, measured as a ratio of nucleus length to nucleus width  
 242 (mean ± SEM; \*\*\*\**p* < 0.0001, two-tailed Student's t-test). (D) Frequency and type of mitotic defects  
 243 observed. Bar, 10 μm. (E) Fluorescence intensity of perinuclear MTs (mean ± SEM; \*\**p* = 0.0011, \*\*\**p* =  
 244 0.0002; two-tailed Student's t-test). A.U. stands for Arbitrary Units. (F) Fluorescence intensity of MTs in  
 245 the prometaphase spindle (4 min after NEBD) and metaphase spindle (2 min before anaphase onset),  
 246 measured from a single focal plane, with the cytoplasmic background subtracted. A decrease in  
 247 fluorescence intensity was detected in prometaphase, but not in metaphase spindles (mean ± SEM \*\**p* =  
 248 0.0018, \*\*\*\**p* ≤ 0.0001, \*\*\**p* = 0.0008; two-tailed Student's t-test).

249 In plants, defective division sites have been mostly attributed to defects in PPB  
250 formation (Schaefer et al., 2017; Yoneda et al., 2005), phragmoplast guidance errors  
251 (CDZ deficiency) (Lipka et al., 2014; Müller, 2019), or abnormal positioning of the  
252 nucleus in prophase (Kimata et al., 2019; Yamada and Goshima, 2018). The current study  
253 identified an independent and hitherto-unappreciated cause of division site abnormality:  
254 spindle motility after NEBD. Furthermore, we identified a conserved protein, TPX2, as  
255 the critical player contributing to spindle positioning in plant cells. Interestingly, a recent  
256 study using neural stem cells of the embryonic developing mouse neocortex showed that  
257 TPX2 knockdown not only affects spindle MT generation but also spindle orientation,  
258 implicating a conserved TPX2-dependent mechanism of spindle positioning (Vargas-  
259 Hurtado et al., 2019). The spindle-specific positioning defect in meiosis II has also been  
260 observed in *jas* and *ps1* mutants of *Arabidopsis*, due to abnormal organelle distribution  
261 (Brownfield et al., 2015). However, meiosis II is a unique system where two spindles  
262 share a cytoplasm and may be partially fused in the absence of an organelle barrier.  
263 Therefore, there is unlikely to be a mechanistic analogy to the case of moss gametophores.

264 In addition to TPX2, this study uncovered the involvement of actin in spindle  
265 positioning. This was also an unexpected observation, as the function of actin in plant cell  
266 division has been mostly attributed to phragmoplast guidance during cytokinesis (Livanos  
267 and Müller, 2019; Rasmussen and Bellinger, 2018). However, actin is known to play an  
268 important role in spindle positioning in animal cells (Almonacid et al., 2014). Of  
269 particular interest are animal oocytes, as they also lack centrosomes. In mouse oocytes,  
270 spindle migration and symmetry breaking are driven by changes in the stability of the  
271 actin meshwork, the formation of which depends on actin nucleators, such as formin-2,  
272 and myosin II motor (Almonacid et al., 2014; Duan et al., 2020). Thus, an analogous  
273 mechanism may transmit force to transport spindles in moss. However, it should be noted  
274 that the role of actin emerged only in the background of a *TPX2* mutation. Thus, sufficient  
275 numbers of spindle MTs may predominate in the “tug-of-war” against actin-dependent  
276 forces in wild-type moss cells. A recent report suggests that spindle positioning can also  
277 take place in the absence of the PPB in seed plants, whose molecular mechanisms are  
278 unknown (Schaefer et al., 2017). TPX2 may be a promising candidate for investigations  
279 to elucidate the PPB-independent mechanism of cell division site positioning.

280

## 281 **Materials and methods**

282

### 283 ***P. patens* culture and transformation**

284 *P. patens* culture and transformation protocols are described in detail elsewhere (Yamada  
285 et al., 2016). In brief, BCDAT agar medium (BCDAT stands for stock solutions B, C, D  
286 and Ammonium Tartrate. Details can be found in (Yamada et al., 2016)) was used for  
287 regular culturing at 25°C under continuous light. Transformation was performed with a  
288 standard polyethylene glycol-mediated method using protoplasts. Transgenic lines were  
289 selected with corresponding antibiotics and confirmed by genotyping PCR or sequencing

290 in the case of CRISPR-generated lines. The GH line, expressing histone H2B-mRFP and  
291 GFP- $\alpha$ -tubulin, was used for transformation in the CRISPR and knockout experiments,  
292 while the mCherry- $\alpha$ -tubulin #52 line was used for Citrine and mNeonGreen endogenous  
293 tagging. The transgenic lines generated in this study are listed in Supplemental Table 1.

294

### 295 **Molecular cloning**

296 Plasmids for Citrine or mNeon-Green endogenous tagging were assembled using In-  
297 Fusion (Clontech, Mountain View, CA, USA), in which Citrine or mNeonGreen genes, a  
298 G418 resistance cassette (only C-terminal tagging), and homologous recombination  
299 regions (500-800 bp of the respective genes) were connected. A similar strategy was used  
300 for assembling the knockout plasmid for *TPX2-5*, wherein a hygromycin resistance  
301 cassette was flanked by the 5'- and 3'-UTR regions of the *TPX2-5* gene. A detailed  
302 protocol for endogenous gene tagging and knockouts in *P. patens* has been previously  
303 published (Yamada et al., 2016). CRISPR gRNAs, targeting one of the exons, were  
304 designed using the online tool, CRISPOR (<http://crispor.tefor.net/>), based on target gene  
305 specificity (off-target score) and predicted frameshift efficiency. Individual gRNAs were  
306 ligated into pCasGuide/pUC18 and pre-digested with BsaI. Next, gRNA sites, together  
307 with the *U6* promoter and gRNA scaffold regions, were amplified by PCR and assembled  
308 into a single multi-gRNA plasmid, also containing a hygromycin resistance cassette for  
309 transient plant selection. The detailed CRISPR protocol is described elsewhere (Leong et  
310 al., 2018). RNAi vectors were cloned using the Gateway system (Invitrogen, Carlsbad,  
311 CA, USA), with pGG624 as the destination vector. Two independent, non-overlapping  
312 RNAi constructs were prepared for each gene. The full list of plasmids and primers used  
313 in this study can be found in Supplemental Table 2.

314

### 315 **Sample preparation for live-cell imaging**

316 The sample preparation method for live-cell imaging is described in detail in a previous  
317 study (Yamada et al., 2016). In brief, a glass-bottom dish, coated with a thin layer of BCD  
318 agar medium (BCD stands for stock solutions B, C, D. Details can be found in (Yamada  
319 et al., 2016)), was inoculated with moss protonema and cultured under continuous light  
320 at 25°C prior to observation. For gametophore induction, 1  $\mu$ M of the synthetic cytokinin,  
321 benzylaminopurine, diluted in 1 mL of distilled water, was added to the 6–7-day-old  
322 colony and incubated for 10 min. Next, the remaining liquid was aspirated with a pipette,  
323 the dish was sealed, and the sample was cultured as described above for 20–22 h prior to  
324 gametophore imaging. Latrunculin A and oryzalin were diluted in 1 mL of distilled water  
325 to final concentrations 5  $\mu$ M and 200 nM, respectively. Prior to drug treatment, most of  
326 the agar pad from the glass-bottom dish was cut and removed to minimize the dilution.  
327 For cell membrane staining, FM4-64 was diluted in distilled water to a final concentration  
328 10  $\mu$ M and added to the live-imaging dish before acquisition, without cutting the agar.  
329 Imaging was performed immediately after drug application. For RNAi induction, 400  $\mu$ L  
330 of 5  $\mu$ M  $\beta$ -estradiol, diluted in distilled water, was added to the pre-cultured protonema,

331 4 d prior to observation. Note that, although  $\beta$ -estradiol was previously supplemented  
332 directly to the agar medium (Miki et al., 2016), we found that it almost entirely inhibited  
333 cell growth in *TPX2-5* RNAi lines; hence, the protocol was modified.

334

### 335 **Microscopy and data analysis**

336 Sample preparation is described above. Images were acquired using a Nikon Ti  
337 microscope (60  $\times$  1.30-NA lens or 40  $\times$  0.95-NA lens; Nikon, Tokyo, Japan) equipped  
338 with a CSU-X1 spinning-disk confocal unit (Yokogawa, Tokyo, Japan) and an electron-  
339 multiplying charge-coupled device camera (ImagEM; Hamamatsu, Hamamatsu, Japan).  
340 All imaging was performed at 22–24 °C in the dark, except for the first division of the  
341 gametophore initial, since gametophore development requires light (3-min light/2-min  
342 dark cycle). For single-leaf imaging, we dissected gametophores with syringe needles and  
343 scissors to isolate single leaves. Leaves were mounted in a drop of water between two  
344 coverslips and images were acquired with a Nikon Ti microscope (10  $\times$  0.30-NA lens) in  
345 bright-field mode. The microscope was controlled using NIS-Elements software (Nikon)  
346 and image data were analyzed with ImageJ (National Institutes of Health, Bethesda, MD,  
347 USA). Prism software was used to plot the graphs and perform statistical analyses  
348 (GraphPad, San Diego, CA, USA). Gametophore and moss colony images were acquired  
349 after 4 weeks of culture using a stereoscopic microscope (Nikon SMZ800N) equipped  
350 with digital camera (ILCE-QX1 $\alpha$ ; Sony, Tokyo, Japan).

351

### 352 **Sequence analysis**

353 We used MAFFT ver. 7.043 (<https://mafft.cbrc.jp/alignment/software/>) to align the amino  
354 acid sequences of the selected full-length proteins and then manually revised them with  
355 MacClade ver. 4.08 OSX ([www.macclade.org](http://www.macclade.org)) to remove gaps. The Jones-Taylor-  
356 Thornton (JTT) model was used to construct maximum-likelihood trees in MEGA5  
357 software ([www.megasoftware.net](http://www.megasoftware.net)). Statistical support for internal branches by bootstrap  
358 analyses was obtained using 1,000 replications. The gene sequence information discussed  
359 in this article is available under the following accession numbers in PHYTOZOME  
360 ([www.phytozome.net](http://www.phytozome.net)): *AtTPX2* (AT1G03780.3); *OsTPX2* (LOC\_Os07g32390.1);  
361 *PpTPX2-1* (Pp3c17\_11160V3.1); *PpTPX2-2* (Pp3c1\_25950V3.1); *PpTPX2-3*  
362 (Pp3c24\_8590V3.2); *PpTPX2-4* (Pp3c23\_4540V3.1); *PpTPX2-5* (Pp3c5\_10270V3.1);  
363 *MpTPX2-1* (Mapoly0016s0083.1); *MpTPX2-2* (Mapoly0105s0040.1) or in UNIPROT  
364 ([www.uniprot.org](http://www.uniprot.org)): *HsTPX2* (Q9ULW0); *GgTPX2* (F1NW64); *XlTPX2* (Q6NUF4).

365

### 366 **Acknowledgments**

367 We would like to thank Momoko Nishina and Yuki Nakaoka for assistance with this  
368 project, Raymundo Alfaro-Aco for comments on the TPX2 functional motifs, Peishan Yi  
369 and Mariana Costa for helpful comments on the manuscript. This work was funded by  
370 JSPS KAKENHI (17H06471) and by JSPS and DFG under the Joint Research Projects-  
371 LEAD with UKRI (to G.G.). The authors declare no competing interests.



372

### 373 **Author contributions**

374 E.K. and G.G. designed the research project, E.K. and M.W.Y. performed experiments,

375 E.K. analyzed the data, and E.K. and G.G. wrote the manuscript.

376

### 377 **References**

378 Alfaro-Aco R, Thawani A, Petry S. 2017. Structural analysis of the role of TPX2 in  
379 branching microtubule nucleation. *J Cell Biol* **177**:7–11.

380 doi:10.1083/jcb.200611141

381 Almonacid M, Terret ME, Verlhac MH. 2014. Actin-based spindle positioning: New  
382 insights from female gametes. *J Cell Sci* **127**:477–483. doi:10.1242/jcs.142711

383 Ambrose JC, Cyr R. 2008. Mitotic spindle organization by the preprophase band. *Mol*  
384 *Plant* **1**:950–960. doi:10.1093/mp/ssn054

385 Arima K, Tamaoki D, Mineyuki Y, Yasuhara H, Nakai T, Shimmen T, Yoshihisa T,  
386 Sonobe S. 2018. Displacement of the mitotic apparatuses by centrifugation reveals  
387 cortical actin organization during cytokinesis in cultured tobacco BY-2 cells. *J*  
388 *Plant Res* **131**:803–815. doi:10.1007/s10265-018-1047-4

389 Bergstralh DT, Dawney NS, Johnston DS. 2017. Spindle orientation : a question of  
390 complex positioning. *Development* **5**:1137–1145. doi:10.1242/dev.140764

391 Boruc J, Deng X, Mylle E, Besbrugge N, Durme M Van, Demidov D, Tomaščíková ED,  
392 Tan T-RC, Vandorpe M, Eeckhout D, Beeckman T, Nowack M, Jaeger G De, Lin  
393 H, Liu B, Damme D Van. 2019. The TPX2-LIKE PROTEIN 3 is the primary  
394 activator of  $\alpha$  Aurora kinases and is essential for embryogenesis. *Plant Physiol.*  
395 doi:10.1101/466276

396 Brownfield L, Yi J, Jiang H, Minina EA, Twell D, Köhler C. 2015. Organelles maintain  
397 spindle position in plant meiosis. *Nat Commun* **6**. doi:10.1038/ncomms7492

398 Buschmann H, Müller S. 2019. Update on plant cytokinesis: rule and divide. *Curr Opin*  
399 *Plant Biol* **52**:97–105. doi:10.1016/j.pbi.2019.07.003

400 Duan X, Li Y, Yi K, Guo F, Wang HY, Wu PH, Yang J, Mair DB, Morales EA, Kalab  
401 P, Wirtz D, Sun SX, Li R. 2020. Dynamic organelle distribution initiates actin-  
402 based spindle migration in mouse oocytes. *Nat Commun* **11**:277.  
403 doi:10.1038/s41467-019-14068-3

404 Kimata Y, Kato T, Higaki T, Kurihara D, Yamada T, Segami S, Morita MT, Maeshima  
405 M, Hasezawa S, Higashiyama T, Tasaka M, Ueda M. 2019. Polar vacuolar  
406 distribution is essential for accurate asymmetric division of Arabidopsis zygotes.  
407 *Proc Natl Acad Sci U S A* **116**:2338–2343. doi:10.1073/pnas.1814160116

408 Kiyomitsu T. 2019. The cortical force-generating machinery: how cortical spindle-  
409 pulling forces are generated. *Curr Opin Cell Biol* **60**:1–8.

410 doi:10.1016/j.ceb.2019.03.001

- 411 Kosetsu K, Murata T, Yamada M, Nishina M, Boruc J, Hasebe M, Van Damme D,  
412 Goshima G. 2017. Cytoplasmic MTOCs control spindle orientation for asymmetric  
413 cell division in plants. *Proc Natl Acad Sci* **114**:E8847–E8854.  
414 doi:10.1073/pnas.1713925114
- 415 Leong SY, Yamada M, Yanagisawa N, Goshima G. 2018. SPIRAL2 Stabilises  
416 Endoplasmic Microtubule Minus Ends in the Moss *Physcomitrella patens*. *Cell*  
417 *Struct Funct* **43**:53–60. doi:10.1247/csf.18001
- 418 Lipka E, Gadeyne A, Stöckle D, Zimmermann S, De Jaeger G, Ehrhardt DW, Kirik V,  
419 Van Damme D, Müller S. 2014. The phragmoplast-orienting kinesin-12 class  
420 proteins translate the positional information of the preprophase band to establish  
421 the cortical division zone in *Arabidopsis thaliana*. *Plant Cell* **26**:2617–2632.  
422 doi:10.1105/tpc.114.124933
- 423 Livanos P, Müller S. 2019. Division Plane Establishment and Cytokinesis. *Annu Rev*  
424 *Plant Biol* **70**:239–267. doi:10.1146/annurev-arplant-050718-100444
- 425 Martinez P, Luo A, Sylvester A, Rasmussen CG. 2017. Proper division plane  
426 orientation and mitotic progression together allow normal growth of maize. *Proc*  
427 *Natl Acad Sci U S A* **114**:2759–2764. doi:10.1073/pnas.1619252114
- 428 Miki T, Nakaoka Y, Goshima G. 2016. Live Cell Microscopy-Based RNAi Screening in  
429 the Moss *Physcomitrella patens*. *Methods Mol Biol* **1470**:225–246.  
430 doi:10.1007/978-1-4939-6337-9\_18
- 431 Moody LA, Kelly S, Rabbinowitsch E, Langdale JA. 2018. Genetic Regulation of the  
432 2D to 3D Growth Transition in the Moss *Physcomitrella patens*. *Curr Biol* **28**:473-  
433 478.e5. doi:10.1016/j.cub.2017.12.052
- 434 Müller S. 2019. Plant cell division — defining and finding the sweet spot for cell plate  
435 insertion. *Curr Opin Cell Biol* **60**:9–18. doi:10.1016/j.ceb.2019.03.006
- 436 Nakaoka Y, Miki T, Fujioka R, Uehara R, Tomioka A, Obuse C, Kubo M, Hiwatashi Y,  
437 Goshima G. 2012. An Inducible RNA Interference System in *Physcomitrella*  
438 *patens* Reveals a Dominant Role of Augmin in Phragmoplast Microtubule  
439 Generation. *Plant Cell* **24**:1478–1493. doi:10.1105/tpc.112.098509
- 440 Ôta T. 1961. The Role of Cytoplasm in Cytokinesis of Plant Cells. *Cytologia* **26**:428–  
441 447. doi:10.1508/cytologia.26.428
- 442 Petry S. 2016. Mechanisms of Mitotic Spindle Assembly. *Annu Rev Biochem* **85**:659–  
443 683. doi:10.1146/annurev-biochem-060815-014528
- 444 Petry S, Groen AC, Ishihara K, Mitchison TJ, Vale RD. 2013. Branching microtubule  
445 nucleation in *Xenopus* egg extracts mediated by augmin and TPX2. *Cell* **152**:768–  
446 777. doi:10.1016/j.cell.2012.12.044
- 447 Rasmussen CG, Bellinger M. 2018. An overview of plant division-plane orientation.  
448 *New Phytol* **219**:505–512. doi:10.1111/nph.15183
- 449 Schaefer E, Belcram K, Uyttewaal M, Duroc Y, Goussot M, Legland D, Laruelle E, De  
450 Tauzia-Moreau ML, Pastuglia M, Bouchez D. 2017. The preprophase band of

- 451 microtubules controls the robustness of division orientation in plants. *Science*  
452 **356**:186–189. doi:10.1126/science.aal3016
- 453 Smertenko A, Assaad F, Baluška F, Bezanilla M, Buschmann H, Drakakaki G, Hauser  
454 MT, Janson M, Mineyuki Y, Moore I, Müller S, Murata T, Otegui MS, Panteris E,  
455 Rasmussen C, Schmit AC, Šamaj J, Samuels L, Staehelin LA, Van Damme D,  
456 Wasteneys G, Žárský V. 2017. Plant Cytokinesis: Terminology for Structures and  
457 Processes. *Trends Cell Biol* **27**:885–894. doi:10.1016/j.tcb.2017.08.008
- 458 Tomašítková E, Demidov D, Jeřábková H, Binarová P, Houben A, Doležel J, Petrovská  
459 B. 2015. TPX2 Protein of Arabidopsis Activates Aurora Kinase 1, But Not Aurora  
460 Kinase 3 In Vitro. *Plant Mol Biol Report* **33**:1988–1995. doi:10.1007/s11105-015-  
461 0890-x
- 462 Vargas-Hurtado D, Brault JB, Piolot T, Leconte L, Da Silva N, Pennetier C, Baffet A,  
463 Marthiens V, Basto R. 2019. Differences in Mitotic Spindle Architecture in  
464 Mammalian Neural Stem Cells Influence Mitotic Accuracy during Brain  
465 Development. *Curr Biol* **29**:2993-3005.e9. doi:10.1016/j.cub.2019.07.061
- 466 Verma DPS. 2001. Cytokinesis and building the cell wall in plants. *Annu rev plant*  
467 *Physiol* **52**:751–784.
- 468 Vos JW, Pieuchot L, Evrard J-L, Janski N, Bergdoll M, De Ronde D, Pérez LH, Sardon  
469 T, Vernos I, Schmit A-C. 2008. The Plant TPX2 Protein Regulates Prospindle  
470 Assembly before Nuclear Envelope Breakdown. *Plant Cell* **20**:2783–2797.  
471 doi:10.1105/tpc.107.056796
- 472 Yamada M, Goshima G. 2018. The KCH kinesin drives nuclear transport and  
473 cytoskeletal coalescence to promote tip cell growth in *Physcomitrella patens*. *Plant*  
474 *Cell* **30**:1496–1510. doi:10.1105/tpc.18.00038
- 475 Yamada M, Miki T, Goshima G. 2016. Imaging Mitosis in the Moss *Physcomitrella*  
476 *patens*. *Methods Mol Biol* **1413**:293–326. doi:10.1007/978-3-319-02904-7
- 477 Yi P, Goshima G. 2019. Transient cotransformation of CRISPR /Cas9 and  
478 oligonucleotide templates enables efficient editing of target loci in *Physcomitrella*  
479 *patens*. *Plant Biotechnol J* 1–3. doi:10.1111/pbi.13238
- 480 Yoneda A, Akatsuka M, Hoshino H, Kumagai F, Hasezawa S. 2005. Decision of  
481 spindle poles and division plane by double preprophase bands in a BY-2 cell line  
482 expressing GFP-tubulin. *Plant Cell Physiol* **46**:531–538. doi:10.1093/pcp/pci055
- 483
- 484

485

## Supplemental Data

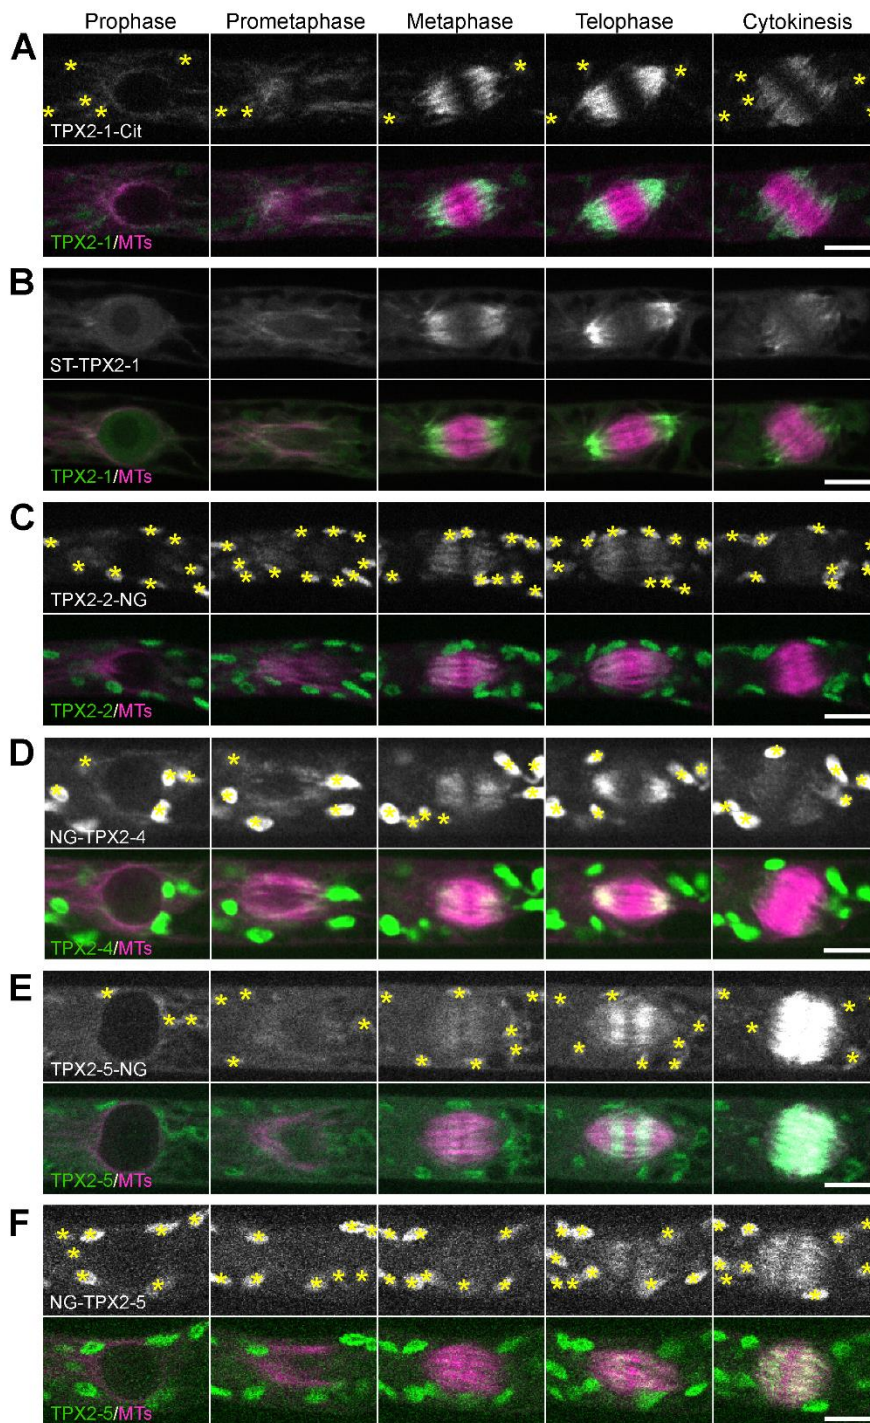

486

### 487 Supplemental Figure 1. Localization of TPX2 proteins during mitosis

488 Live-cell imaging was performed in caulonemal apical cells of *P. patens*, expressing mCherry-tubulin and  
489 one of the following TPX2 proteins endogenously tagged with a fluorophore: (A) TPX2-1-Citrine; (B)  
490 SunTag-TPX2-1; (C) TPX2-2-mNeonGreen; (D) mNeonGreen-TPX2-4; (E) TPX2-5-mNeonGreen; (F)  
491 mNeonGreen-TPX2-5. The SunTag-TPX2-1 line also expressed scFv-GCN-sfGFP under a  $\beta$ -estradiol-  
492 inducible promoter. Asterisks indicate autofluorescent chloroplasts. Bars, 10  $\mu$ m.



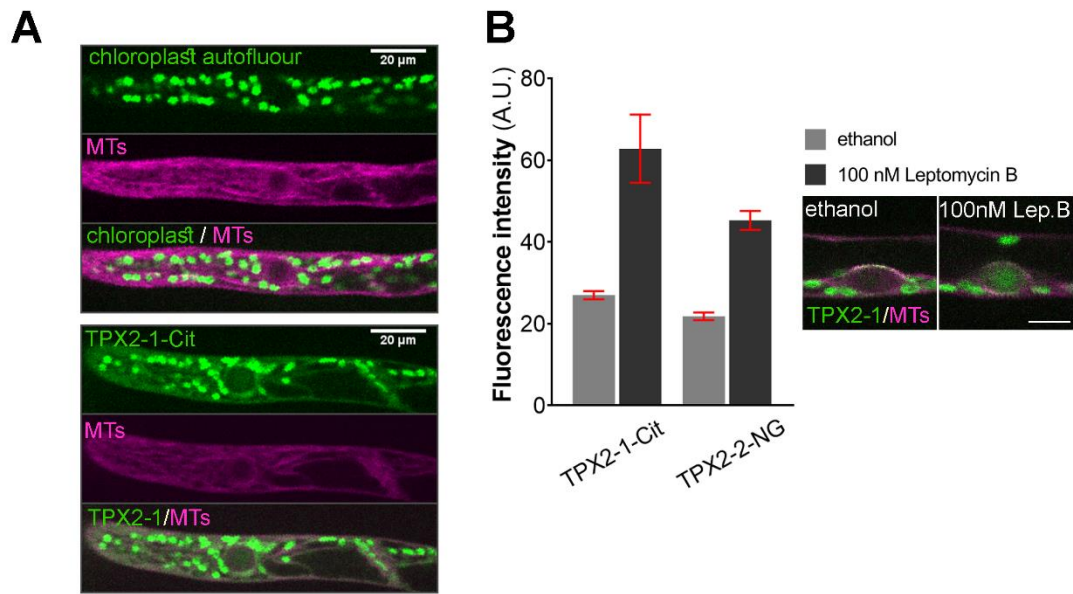

493

494 **Supplemental Figure 2. Interphase localization of TPX2**

495 (A) Live-cell imaging was performed in caulonemal apical cells of *P. patens*, expressing only mCherry-  
496 tubulin (upper panels) or mCherry-tubulin and TPX2-1-Citrine (bottom panels). Cytoplasmic signals  
497 increased in the TPX2-1-Citrine line. Bars, 20 μm. (B) Fluorescence intensity in the nucleus before and  
498 after inhibiting nuclear export with 100 nM Leptomycin B (mean ± SEM) after subtracting the cytoplasmic  
499 background. Increase in nuclear signals after nuclear export inhibition suggests that TPX2-1-Cit and TPX2-  
500 2-NG are actively shuttled between the nucleus and cytoplasm.

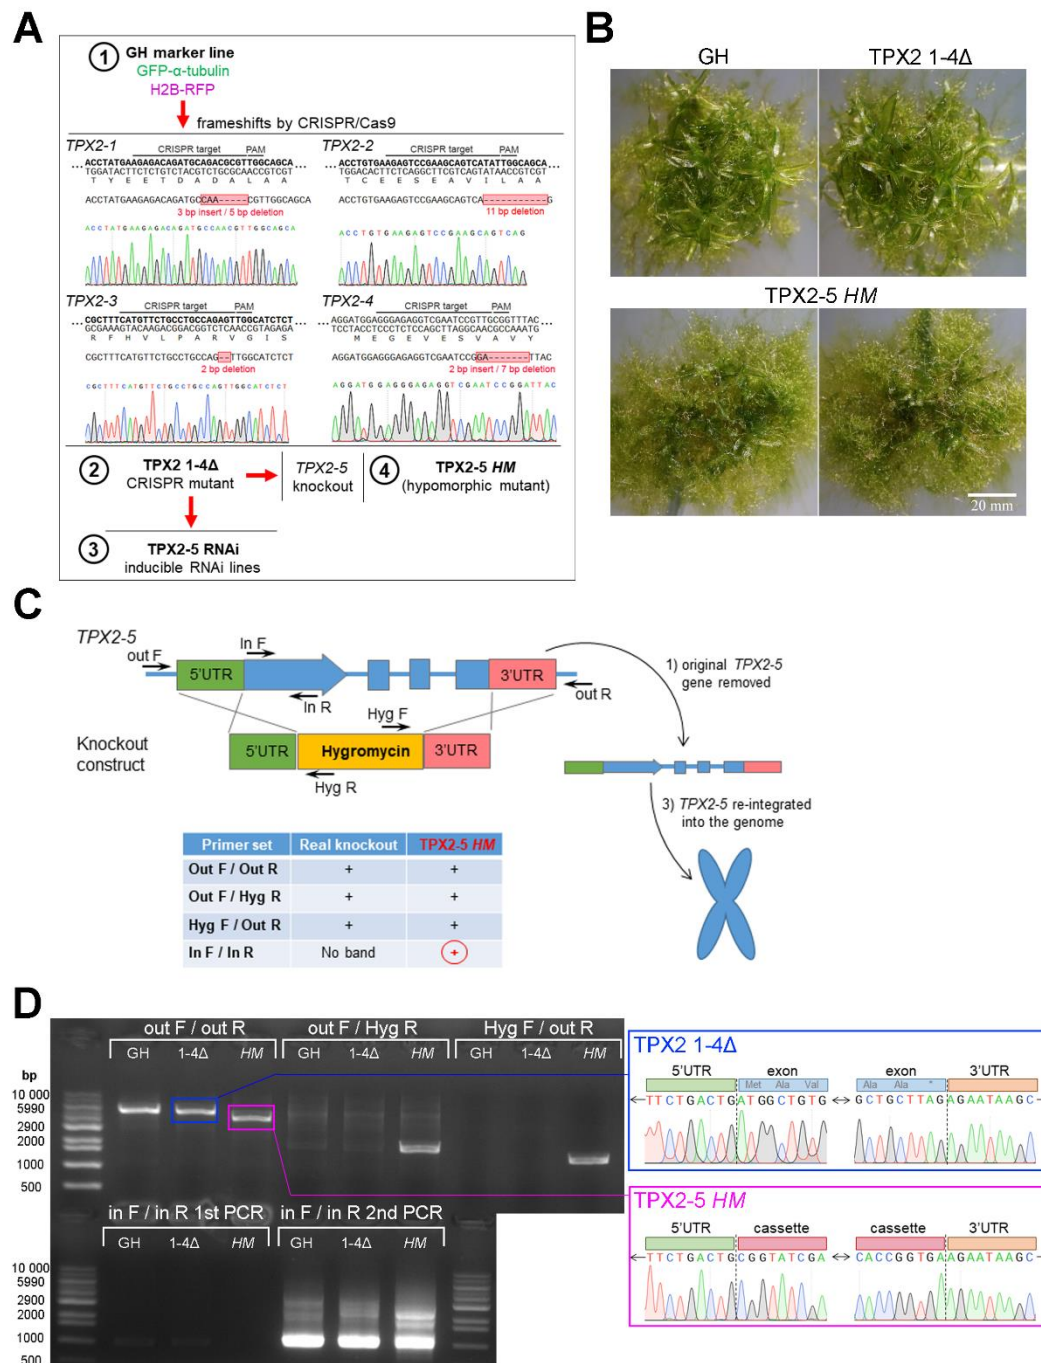

501

502 **Supplemental Figure 3. Isolation of hypomorphic TPX2 mutants**

503 (A) Schematic explanation of *P. patens* lines created and used in this study and representative sequencing  
504 data of frameshift mutations in the *TPX2 1-4 $\Delta$*  line. (B) Representative colonies of GH (control), *TPX2 1-4 $\Delta$*   
505 (CRISPR frameshift mutant), and *TPX2-5 HM* (hypomorphic mutant). The *TPX2 1-4 $\Delta$*  line is  
506 indistinguishable from wild-type moss, while *TPX2-5 HM* has dwarf gametophores. Bar, 20 mm. (C)  
507 Schematic explanation of *TPX2-5* knockout experiments, *TPX2-5 HM* line selection, and genotyping PCR.  
508 (D) Results of genotyping PCR and sequencing of the *TPX2-5* locus. For unknown reasons, first round of  
509 F/in R PCR yielded barely visible bands and therefore, we performed a second round of PCR using diluted  
510 product of the first PCR as the template.

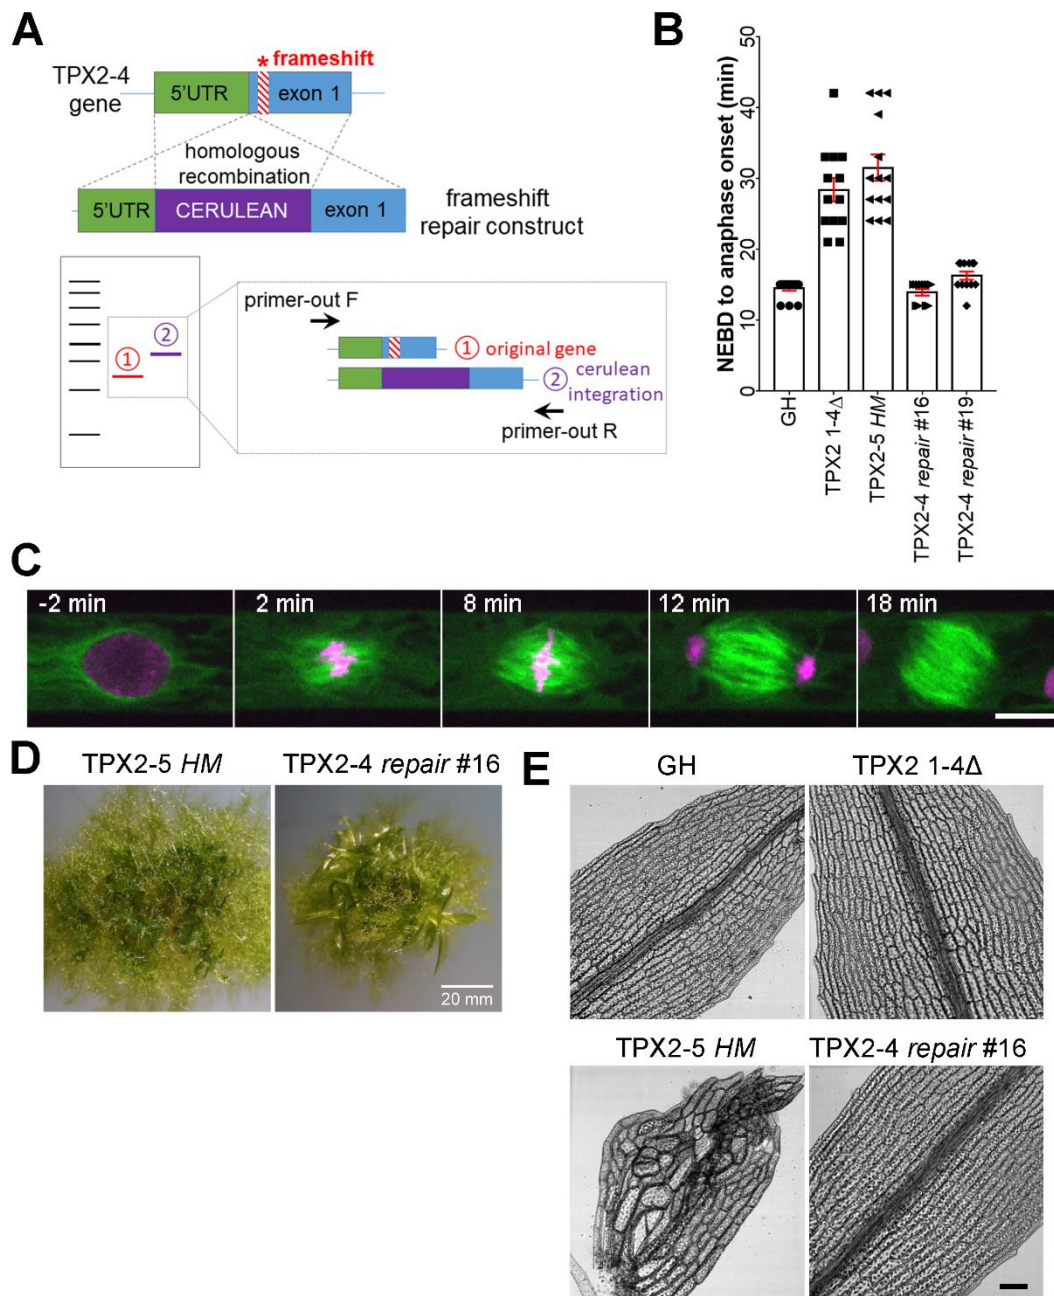

511

512 **Supplemental Figure 4. Rescue of the *TPX2-5 HM* phenotypes by frameshift repair of the *TPX2-4***  
 513 **gene**

514 (A) Schematic illustration of the frameshift repair experiment. In brief, the N-terminus-coding region of  
 515 the *TPX2-4* gene was tagged with Cerulean flanked with ~500 bp of the 5'-UTR and exon region (without  
 516 the frameshift mutation) by homologous recombination. Construct integration was verified by PCR. (B)  
 517 Mitotic duration of protonemal cells calculated from NEBD to anaphase onset in GH, *TPX2 1-4Δ*, *TPX2-5*  
 518 *HM*, and two independent *TPX2-4* repair lines (mean ± SEM). (C) Mitotic progression in the *TPX2-4* repair  
 519 #16 line. Note that perinuclear MTs and prometaphase spindle formation were restored. Bar, 10 μm. (D)  
 520 Representative images of the *TPX2-5 HM* colony with dwarf gametophores and a *TPX2-4* repair #16 colony  
 521 with normal gametophores. (E) Representative images of gametophore leaf cells in GH, *TPX2 1-4Δ*, *TPX2-*  
 522 *5 HM*, and *TPX2-4* repair #16 lines. Bar, 100 μm.

523

524 **Supplemental Video 1. Localization of TPX2 proteins during mitosis**

525 Live-cell imaging was performed in *P. patens* apical caulonemal cells expressing  
526 mCherry-tubulin (magenta) and one of the following tagged proteins (green): TPX2-1-  
527 Citrine, TPX2-2-mNeonGreen, mNeonGreen-TPX2-4, or TPX2-5-mNeonGreen. Images  
528 were acquired every 30 s at a single focal plane. Bar, 10  $\mu\text{m}$ .

529

530 **Supplemental Video 2. Spindle motility underlies the erroneous phragmoplast**  
531 **positioning in *TPX2-5 HM* gametophore initial cells**

532 Live-cell imaging was performed in *P. patens* gametophore initial cells expressing  
533 mCherry-tubulin and Histone H2B-mCherry (chromosomes and MTs are labeled with the  
534 same color). Images were acquired as a z-stack (20  $\mu\text{m}$ , 2.5  $\mu\text{m}$  step) every 5 min and the  
535 best focal plane is presented. Bar, 10  $\mu\text{m}$ .

536

537 **Supplemental Video 3. Mitotic defects in the *TPX2-5 RNAi* line**

538 Representative images of mitotic defects in the *TPX2-5 RNAi* lines. Live-cell imaging  
539 was performed in *P. patens* protonemal apical cells expressing GFP-tubulin (green) and  
540 histone H2B-mCherry (magenta). Images were acquired at a single focal plane every 2  
541 min. Bar, 10  $\mu\text{m}$ .

542

543 **Supplemental Video 4. Spindle-collapse phenotype in the gametophore initial of**  
544 ***TPX2-5 HM* mutants**

545 Representative video of spindle collapse followed by chromosome missegregation,  
546 observed in approximately 10% of *TPX2-5 HM* gametophore initial cells. Images were  
547 acquired as a z-stack (20  $\mu\text{m}$ , 2.5  $\mu\text{m}$  step) every 5 min and the best focal plane is  
548 presented. Bar, 10  $\mu\text{m}$ .

549
